# Supplementary material for: GARP dysfunction results in COPI displacement, depletion of Golgi v-SNAREs and calcium homeostasis proteins
Source: PubMed Central journal article supplement (PMC9791199; doi:10.3389/fcell.2022.1066504), 2022-12-12

## Supplementary information files

# GARP dysfunction results in COPI displacement, depletion of Golgi v-SNAREs and calcium homeostasis proteins

Amrita Khakurel, Tetyana Kudlyk, Irina Pokrovskaya, Zinia D'Souza and Vladimir V. Lupashin\*

Department of Physiology and Cell Biology, University of Arkansas for Medical Sciences, Little Rock, AR, United States

Supplemental figure 1. Uncropped Western blot images of the representative blots used in the manuscript.

Supplemental Table 1: The excel file included in supplemental materials is the proteomics data. The proteomics data is available in PRIDE database with accession number PXD035659.

Uncropped images of Western Blot

Figure 2B

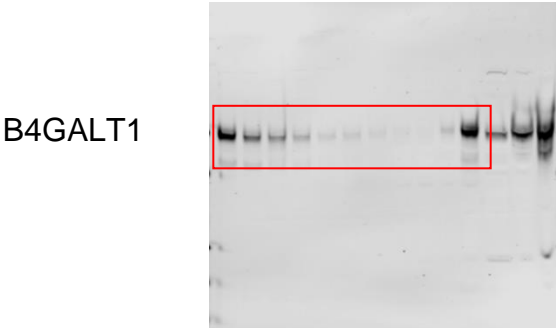

Figure 3D

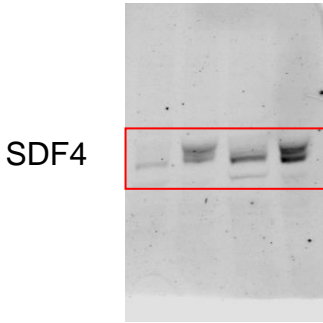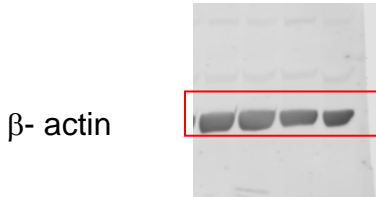

Figure 3F

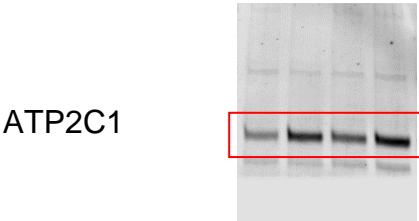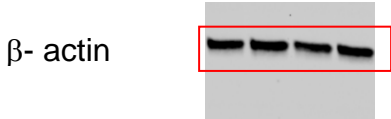

Figure 4C

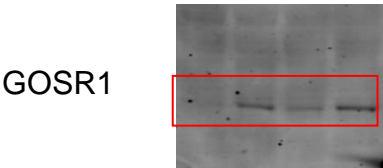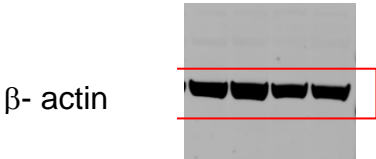

**Figure 5A**

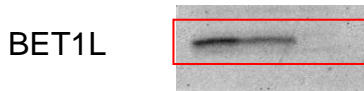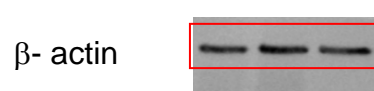

**Figure 5A**

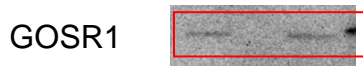

**Figure 5B**

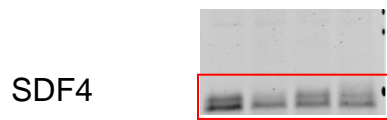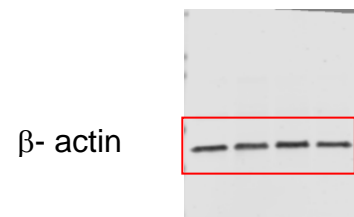

**Figure 5D**

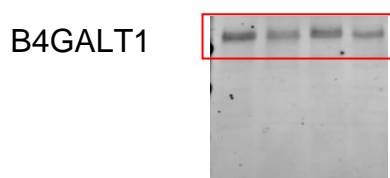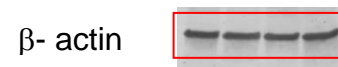

**Figure 5F**

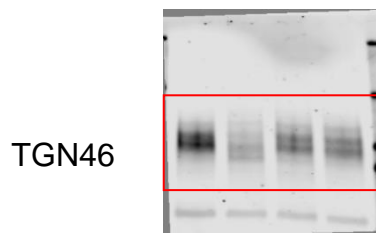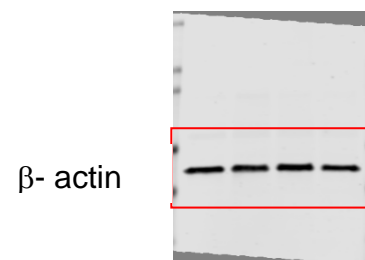

**Figure 7E**

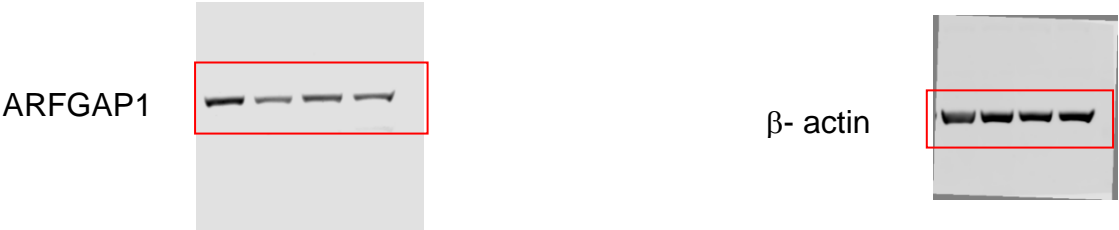

**Figure 9C**

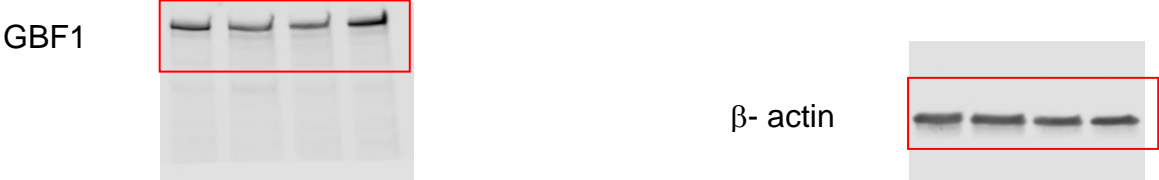

Supplement: Presentation1.pdf [file Presentation1.pdf]
